# Supplementary material
Source: Springer Nature journal article supplement (https://www.springermedizin.de/resource/supplementary/12962_2006_36_MOESM1_ESM.pdf/9572002)

**PANEL A**

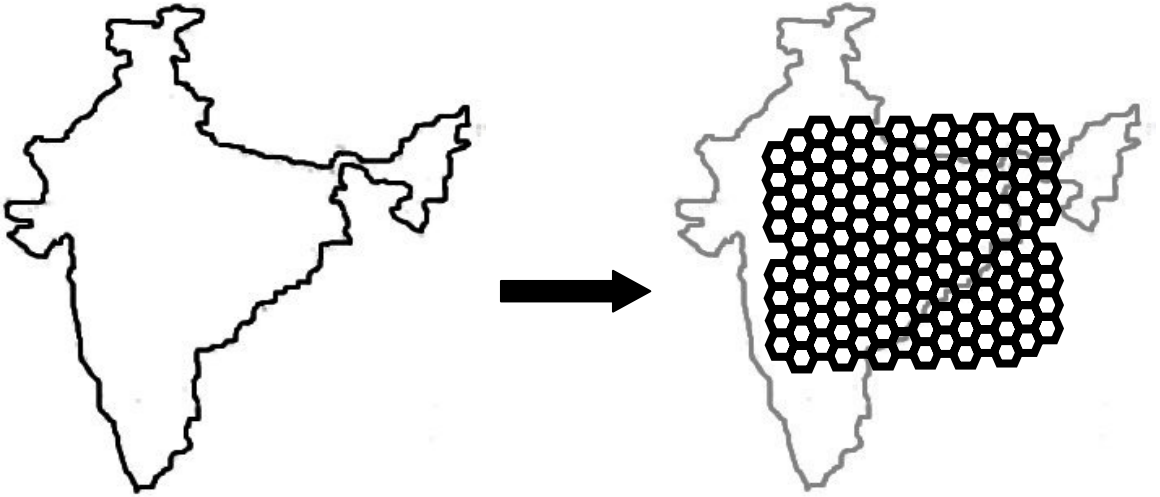

**PANEL B**

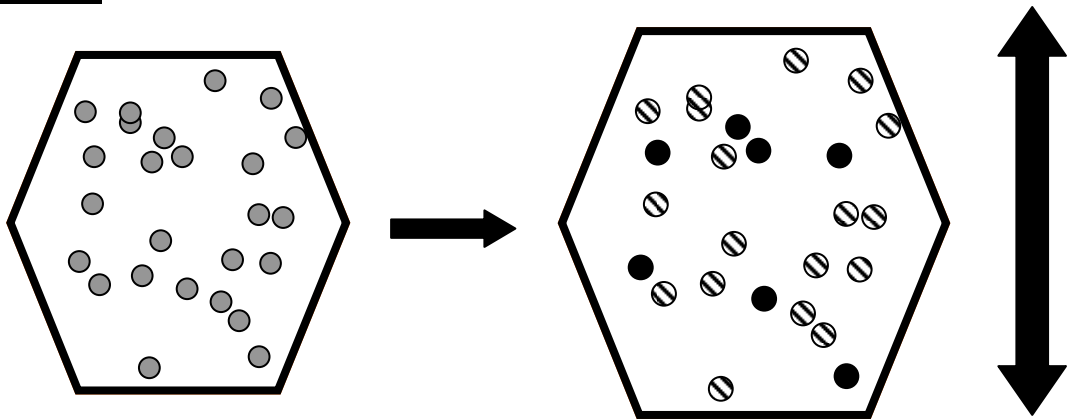

**PANEL C**

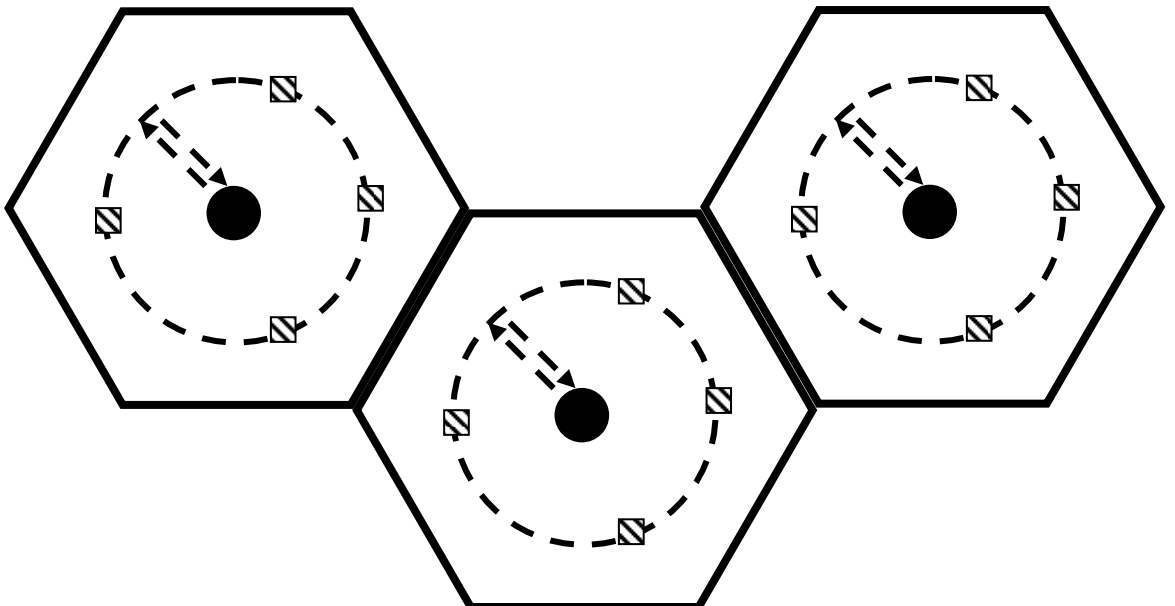

Supplement: MOESM1 [file 9572002]
